# Supplementary material
Source: PubMed Central journal article supplement (PMC6278988)

**Mutational screening of newly diagnosed multiple myeloma patients by deep targeted sequencing**

Yanira Ruiz-Heredia,<sup>1</sup> Beatriz Sánchez-Vega,<sup>1</sup> Esther Onecha,<sup>1</sup> Santiago Barrio,<sup>2</sup> Rafael Alonso,<sup>3</sup> Jose Carlos Martínez-Ávila,<sup>4</sup> Isabel Cuenca,<sup>1</sup> Xavier Agirre,<sup>5</sup> Esteban Braggio,<sup>6</sup> Miguel-T. Hernández,<sup>7</sup> Rafael Martínez,<sup>8</sup> Laura Rosiñol,<sup>9</sup> Norma Gutierrez,<sup>10</sup> Marisa Martín-Ramos,<sup>9</sup> Enrique M. Ocio,<sup>10</sup> María-Asunción Echeveste,<sup>11</sup> Jaime Pérez de Oteyza,<sup>12</sup> Albert Oriol,<sup>10</sup> Joan Bargay,<sup>13</sup> Mercedes Gironella,<sup>14</sup> Rosa Ayala,<sup>1</sup> Joan Bladé,<sup>15</sup> María-Victoria Mateos,<sup>10</sup> Klaus M. Kortum,<sup>2</sup> Keith Stewart,<sup>6</sup> Ramón García-Sanz,<sup>10</sup> Jesús San Miguel,<sup>5</sup> Juan José Lahuerta<sup>3</sup> and Joaquín Martínez-Lopez<sup>1</sup>

<sup>1</sup>Department of Hematology, Hospital Universitario 12 de Octubre - Hematological Malignancies Clinical Research Unit H120-CNIO, Madrid, Spain; <sup>2</sup>Department of Internal Medicine II, University Hospital Würzburg, Germany; <sup>3</sup>Department of Hematology, Hospital Universitario 12 de Octubre, Madrid, Spain; <sup>4</sup>Clinical Pharmacology Department, La Paz University Hospital, IdiPAZ, UAM, Madrid, Spain; <sup>5</sup>Department of Hematology, Fundación de Investigación Médica Aplicada (FIAMA), Pamplona, Spain; <sup>6</sup>Department of Hematology, Mayo Clinic, Phoenix/Scottsdale, AZ, USA; <sup>7</sup>Department of Hematology, Hospital Universitario de Canarias, Tenerife, Spain; <sup>8</sup>Department of Hematology, Hospital Clínico Universitario San Carlos, Madrid, Spain; <sup>9</sup>Department of Hematology, Hospital Clínic of Barcelona, Institut d'Investigacions Biomèdiques August Pi i Sunyer (IDIBAPS), University of Barcelona, Spain; <sup>10</sup>Department of Hematology, Hospital Universitario de Salamanca- Centro Investigación del Cáncer and Hospital Universitario-IBSAL, Salamanca, Spain; <sup>11</sup>Department of Hematology, Hospital Universitario Donostia, San Sebastián, Spain; <sup>12</sup>Department of Hematology, Hospital Madrid Norte Sanchinarro, Madrid, Spain; <sup>13</sup>Department of Hematology, Hospital Sont Llatzer, Palma de Mallorca, Spain; <sup>14</sup>Department of Hematology, Hospital Universitario Vall de Hebrón de Barcelona, Spain and <sup>15</sup>Department of Hematology, Hospital Clínic i Provincial, Institut d'Investigacions Biomèdiques August Pi i Sunyer (IDIBAPS), Barcelona, Spain

Correspondence: [jmarti01@med.ucm.es](mailto:jmarti01@med.ucm.es)  
doi:10.3324/haematol.2018.188839

## Supplementary Data

Table S1: Genes included in the panel sequencing for variant detection.

|        |        |         |         |          |           |          |
|--------|--------|---------|---------|----------|-----------|----------|
| ACTG1  | ATM    | B2M     | BAGE2   | BIRC2    | BIRC3     | BRAF     |
| CARD11 | CCNB1  | CCND1   | CCNT1   | CDK4     | CDK7      | CDKN1B   |
| CDKN2A | CDKN2C | CRBN    | CSNK2A1 | CUL4A    | CUL4B     | CXCR4    |
| CYLD   | DIS3   | EGFR    | EGR1    | FAM46C   | FGFR3     | GRB2     |
| IDH1   | IDH2   | IDH3A   | IFNGR2  | IGF1R    | IKZF1     | IKZF3    |
| IL6    | IL6R   | IL6ST   | IRF4    | JAK2     | KDM6A     | KRAS     |
| MAF    | MAFB   | MAP3K14 | MAX     | MYC      | MYD88     | NFKB1B   |
| NR3C1  | NRAS   | PRDM1   | PSMA1   | PSMB5    | PSMB8     | PSMB9    |
| PSMD1  | PTPN11 | RASA2   | RB1     | RIPK1    | RIPK4     | SHC1     |
| SP140  | SRF    | STAT3   | TGFBR2  | TLR4     | TNFRSF13B | TNFRSF21 |
| TNFSF9 | TP53   | TRAF2   | TRAF3   | TRAF3IP1 | WHSC1     | XBP1     |

Table S2: List of genes grouped by pathway.

| NFκB    |           | RAS   | CEREBLON | CYCLIN | MYC   |
|---------|-----------|-------|----------|--------|-------|
| BIRC2   | RIPK4     | BRAF  | CRBN     | CCNB1  | MAX   |
| BIRC3   | TLR4      | EGFR  | CUL4A    | CCND1  | MYC   |
| CARD11  | TNFRSF13B | FGFR3 | CUL4B    | CCNT1  | PRDM1 |
| CYLD    | TNFRSF21  | IGF1R | IKZF1    | CDK4   | XBP1  |
| MAP3K14 | TNFSF9    | KRAS  | IKZF3    | CDK7   |       |
| MYD88   | TRAF2     | NRAS  | IRF4     | CDKN1B |       |
| NFKB1B  | TRAF3     | RASA2 | MYC      | CDKN2A |       |
| RIPK1   | TRAF3IP1  |       |          | CDKN2C |       |

Table S3: 168 detected mutations and annotation.

| SAMPLE | GENE     | FUNC     | Gtype | LOC    | PTEIN  | POS_COV | VAR_COV | VRF(%) | GERM | SIFT        | POLYPHEN          | COSMIC | dbSNP |
|--------|----------|----------|-------|--------|--------|---------|---------|--------|------|-------------|-------------------|--------|-------|
| 2      | IDH2     | UTR 3'   | G/A   | UTR 3' | _      | 1692    | 823     | 49%    | yes  | _           | _                 |        |       |
| 3      | NRAS     | missense | G/T   | exonic | Q61K   | 91      | 45      | 49%    | yes  | deleterious | benign            | 1      | 1     |
| 7      | ATM      | missense | T/C   | exonic | L1444P | 436     | 47      | 11%    |      | deleterious | probably_damaging |        |       |
| 7      | DIS3     | missense | A/G   | exonic | F775L  | 1898    | 212     | 11%    |      | deleterious | probably_damaging |        |       |
| 9      | NRAS     | missense | C/G   | exonic | G12A   | 2759    | 383     | 14%    | yes  | deleterious | benign            | 1      | 1     |
| 10     | DIS3     | missense | C/G   | exonic | R780T  | 220     | 86      | 39%    |      | deleterious | probably_damaging | 1      |       |
| 11     | NRAS     | missense | T/C   | exonic | Q61R   | 509     | 132     | 26%    |      | tolerated   | benign            | 1      | 1     |
| 11     | ACTG1    | missense | C/T   | exonic | E3K    | 720     | 162     | 23%    |      | tolerated   | benign            |        |       |
| 13     | ACTG1    | missense | A/G   | exonic | V35A   | 363     | 117     | 32%    |      | deleterious | probably_damaging |        |       |
| 13     | IRF4     | missense | C/T   | exonic | A341V  | 658     | 311     | 47%    |      | deleterious | probably_damaging |        | 1     |
| 13     | KRAS     | missense | T/G   | exonic | Q61H   | 935     | 370     | 40%    |      | deleterious | benign            | 1      | 1     |
| 13     | CUL4A    | missense | G/A   | exonic | E546K  | 1045    | 432     | 41%    |      | deleterious | benign            |        |       |
| 16     | CYLD     | missense | T/A   | exonic | F352I  | 433     | 21      | 5%     |      | deleterious | benign            |        |       |
| 16     | TLR4     | missense | G/A   | exonic | C281Y  | 116     | 57      | 49%    |      | deleterious | probably_damaging |        | 1     |
| 16     | ATM      | missense | C/T   | exonic | S333F  | 204     | 83      | 41%    |      | deleterious | benign            |        | 1     |
| 17     | KRAS     | missense | C/T   | exonic | G13D   | 783     | 341     | 44%    |      | deleterious | probably_damaging | 1      | 1     |
| 19     | SP140    | splice   | T/C   | splice | _      | 219     | 83      | 37%    |      | _           | _                 |        |       |
| 21     | NRAS     | missense | G/T   | exonic | Q61K   | 50      | 20      | 40%    |      | deleterious | benign            | 1      | 1     |
| 24     | DIS3     | missense | C/T   | exonic | E501K  | 240     | 20      | 8%     | yes  | deleterious | probably_damaging |        |       |
| 24     | DIS3     | missense | G/C   | exonic | F120L  | 75      | 40      | 53%    | yes  | deleterious | probably_damaging |        |       |
| 24     | IDH2     | missense | G/A   | exonic | T435M  | 608     | 398     | 65%    | yes  | tolerated   | benign            |        | 1     |
| 30     | TRAF3IP1 | missense | A/G   | exonic | N351D  | 162     | 20      | 12%    |      | tolerated   | benign            |        |       |
| 30     | ACTG1    | missense | G/C   | exonic | A29G   | 623     | 65      | 10%    |      | deleterious | probably_damaging |        | 1     |
| 32     | BRAF     | missense | C/T   | exonic | D594N  | 307     | 79      | 26%    |      | deleterious | probably_damaging | 1      |       |
| 32     | TP53     | missense | G/A   | exonic | R273C  | 563     | 164     | 29%    |      | deleterious | probably_damaging | 1      | 1     |
| 32     | KRAS     | UTR 3'   | A/C   | UTR 3' | _      | 1489    | 407     | 27%    |      | _           | _                 |        |       |
| 32     | DIS3     | missense | A/C   | exonic | Y782D  | 1969    | 851     | 43%    |      | deleterious | probably_damaging |        |       |
| 33     | KRAS     | missense | T/A   | exonic | Q61H   | 1590    | 212     | 13%    |      | deleterious | benign            | 1      | 1     |
| 33     | DIS3     | missense |       | exonic | P635S  | 516     | 326     | 63%    |      | tolerated   | benign            | 1      | ?     |
| 34     | RIPK4    | missense | G/T   | exonic | N498K  | 1771    | 38      | 2%     |      | deleterious | probably_damaging |        |       |

| SAMPLE | GENE   | FUNC     | Gtype | LOC    | PTEIN  | POS_COV | VAR_COV | VRF(%) | GERM | SIFT        | POLYPHEN          | COSMIC | dbSNP |
|--------|--------|----------|-------|--------|--------|---------|---------|--------|------|-------------|-------------------|--------|-------|
| 34     | IDH3A  | missense | T/A   | exonic | D139E  | 409     | 217     | 53%    |      | deleterious | 0.755             | 1      | 1     |
| 36     | NR3C1  | missense | C/T   | exonic | A229T  | 232     | 109     | 47%    |      | tolerated   | benign            |        | 1     |
| 36     | TP53   | missense | A/G   | exonic | Y126H  | 853     | 158     | 19%    |      | deleterious | probably_damaging | 1      |       |
| 36     | RB1    | missense | G/C   | exonic | A59P   | 214     | 181     | 85%    |      | tolerated   | benign            |        | 1     |
| 36     | MYC    | UTR 5'   | C/T   | UTR 5' | _      | 409     | 209     | 51%    |      | _           | _                 |        | 1     |
| 39     | GRB2   | missense | C/G   | exonic | R112P  | 401     | 143     | 36%    |      | deleterious | probably_damaging | 1      |       |
| 39     | IL6    | missense | G/A   | exonic | E200K  | 689     | 193     | 28%    |      | deleterious | benign            |        |       |
| 40     | DIS3   | missense | T/C   | exonic | D479G  | 989     | 127     | 13%    | yes  | deleterious | probably_damaging | 1      |       |
| 40     | TP53   | missense | T/A   | exonic | D208V  | 915     | 324     | 35%    | yes  | deleterious | probably_damaging | 1      |       |
| 40     | TP53   | nonsense | C/A   | exonic | E204*  | 918     | 326     | 36%    | yes  | _           | _                 | 1      |       |
| 42     | DIS3   | missense | C/A   | exonic | D958Y  | 139     | 33      | 24%    |      | deleterious | probably_damaging |        |       |
| 42     | DIS3   | missense | G/A   | exonic | R820W  | 699     | 98      | 14%    |      | deleterious | probably_damaging |        | 1     |
| 42     | WHSC1  | missense | A/C   | exonic | S421R  | 357     | 166     | 46%    |      | tolerated   | benign            |        |       |
| 42     | DIS3   | missense | C/T   | exonic | G249E  | 1125    | 226     | 20%    |      | deleterious | probably_damaging |        | 1     |
| 45     | BIRC2  | missense | C/T   | exonic | P500S  | 319     | 173     | 54%    |      | tolerated   | benign            |        | 1     |
| 47     | CYLD   | missense | C/G   | exonic | T386R  | 183     | 53      | 29%    |      | deleterious | probably_damaging |        | 1     |
| 47     | ATM    | missense | C/G   | exonic | S333F  | 195     | 86      | 44%    |      | deleterious | benign            |        | 1     |
| 47     | ATM    | missense | A/T   | exonic | D1853V | 134     | 100     | 75%    |      | deleterious | benign            | 1      | 1     |
| 48     | BRAF   | missense | C/T   | exonic | G466E  | 440     | 24      | 5%     |      | deleterious | probably_damaging | 1      | 1     |
| 48     | TRAF3  | nonsense | G/T   | exonic | E332*  | 254     | 57      | 22%    |      | _           | _                 |        |       |
| 48     | CDKN1B | missense | T/C   | exonic | I119T  | 741     | 324     | 44%    |      | tolerated   | benign            |        | 1     |
| 48     | RIPK4  | missense | T/A   | exonic | D669V  | 1436    | 688     | 48%    |      | deleterious | probably_damaging |        |       |
| 55     | NRAS   | missense | C/T   | exonic | G12D   | 757     | 376     | 50%    | yes  | deleterious | benign            | 1      | 1     |
| 62     | BRAF   | missense | C/G   | exonic | G469A  | 1081    | 75      | 7%     |      | deleterious | probably_damaging | 1      | 1     |
| 62     | PSMA1  | UTR 3'   | A/G   | UTR 3' | _      | 405     | 155     | 38%    |      | _           | _                 |        |       |
| 62     | KRAS   | missense | G/T   | exonic | A18D   | 937     | 389     | 42%    |      | deleterious | probably_damaging | 1      |       |
| 65     | NRAS   | missense | C/G   | exonic | G12A   | 2827    | 2073    | 73%    |      | deleterious | benign            | 1      | 1     |
| 65     | TRAF2  | missense | G/A   | exonic | D488N  | 3862    | 2535    | 66%    |      | deleterious | probably_damaging |        | 1     |
| 65     | CDK7   | missense | A/G   | exonic | D16G   | 5199    | 3249    | 63%    |      | deleterious | probably_damaging |        |       |
| 70     | ATM    | missense | C/G   | exonic | L2379V | 2331    | 1145    | 50%    |      | deleterious | benign            |        |       |
| 73     | FGFR3  | missense | G/T   | exonic | G377C  | 552     | 67      | 12%    |      | tolerated   | benign            |        | 1     |
| 73     | RASA2  | missense | C/G   | exonic | F585L  | 995     | 95      | 10%    |      | deleterious | probably_damaging |        |       |
| 76     | TRAF3  | missense | G/C   | exonic | K453N  | 604     | 46      | 8%     |      | deleterious | probably_damaging |        |       |
| 76     | TRAF3  | missense | G/A   | exonic | G416E  | 968     | 60      | 6%     |      | deleterious | probably_damaging |        |       |
| 76     | WHSC1  | missense | G/C   | exonic | D81H   | 862     | 65      | 8%     |      | deleterious | probably_damaging |        |       |
| 76     | TP53   | missense | C/G   | exonic | K139N  | 2129    | 68      | 3%     |      | deleterious | probably_damaging | 1      |       |

| SAMPLE | GENE    | FUNC     | Gtype | LOC    | PTEIN  | POS_COV | VAR_COV | VRF(%) | GERM | SIFT        | POLYPHEN          | COSMIC | dbSNP |
|--------|---------|----------|-------|--------|--------|---------|---------|--------|------|-------------|-------------------|--------|-------|
| 76     | CCNT1   | missense | G/A   | exonic | S292L  | 860     | 69      | 8%     |      | tolerated   | probably_damaging |        |       |
| 76     | TRAF3   | missense | C/G   | exonic | F445L  | 888     | 116     | 13%    |      | deleterious | probably_damaging |        |       |
| 76     | TRAF2   | missense | C/T   | exonic | H307Y  | 2812    | 212     | 7%     |      | deleterious | probably_damaging |        |       |
| 76     | CUL4B   | missense | C/G   | exonic | E840Q  | 1521    | 495     | 33%    |      | deleterious | probably_damaging |        |       |
| 76     | B2M     | missense | C/G   | exonic | I21M   | 1180    | 522     | 44%    |      | deleterious | benign            |        |       |
| 76     | BRAF    | missense | G/A   | exonic | S133L  | 1840    | 789     | 43%    |      | deleterious | benign            |        |       |
| 76     | IKZF3   | missense | C/T   | exonic | M58I   | 1975    | 836     | 42%    |      | tolerated   | benign            |        |       |
| 78     | TNFSF9  | missense | C/A   | exonic | R150Q  | 518     | 237     | 46%    |      | tolerated   | benign            |        |       |
| 79     | DIS3    | missense | T/C   | exonic | E196G  | 292     | 20      | 6%     |      | deleterious | probably_damaging |        |       |
| 79     | FAM46C  | missense | G/T   | exonic | M215I  | 700     | 35      | 5%     |      | deleterious | benign            |        |       |
| 79     | KRAS    | missense | T/G   | exonic | K117N  | 453     | 37      | 8%     |      | deleterious | probably_damaging | 1      |       |
| 79     | KRAS    | missense | T/A   | exonic | Q61L   | 1701    | 500     | 29%    |      | deleterious | probably_damaging | 1      | 1     |
| 86     | CDKN1B  | stoploss | A/T   | exonic | *199Y  | 574     | 143     | 25%    |      | -           | -                 |        |       |
| 86     | PSMB9   | missense | C/T   | exonic | R163C  | 438     | 166     | 38%    |      | deleterious | probably_damaging |        |       |
| 86     | MYC     | missense | C/A   | exonic | H302Q  | 362     | 182     | 50%    |      | deleterious | probably_damaging |        | 1     |
| 89     | TP53    | missense | A/T   | exonic | N345K  | 250     | 20      | 8%     |      | deleterious | probably_damaging | 1      |       |
| 96     | CYLD    | missense | C/G   | exonic | Q820E  | 785     | 50      | 6%     |      | deleterious | benign            | 1      |       |
| 96     | BIRC3   | missense | A/G   | exonic | D241G  | 1290    | 592     | 46%    |      | tolerated   | benign            |        |       |
| 96     | IFNGR2  | missense | C/T   | exonic | T299I  | 1272    | 619     | 49%    |      | deleterious | benign            |        |       |
| 101    | WHSC1   | missense | A/C   | exonic | T569P  | 349     | 23      | 7%     |      | deleterious | probably_damaging |        |       |
| 101    | RASA2   | stoploss | G/C   | exonic | *850Y  | 266     | 29      | 11%    |      | -           | -                 |        |       |
| 101    | KDM6A   | nonsense | G/A   | exonic | W127*  | 317     | 65      | 21%    |      | -           | -                 |        |       |
| 101    | RB1     | nonsense | G/A   | exonic | W681*  | 2250    | 278     | 13%    |      | -           | -                 |        |       |
| 102    | IRF4    | missense | G/T   | exonic | C214F  | 1040    | 482     | 46%    |      | tolerated   | benign            |        |       |
| 103    | GRB2    | missense | C/T   | exonic | A197T  | 244     | 114     | 47%    |      | tolerated   | benign            |        |       |
| 103    | KRAS    | missense | T/G   | exonic | Q61H   | 2938    | 389     | 13%    |      | deleterious | benign            | 1      | 1     |
| 105    | DIS3    | missense | A/T   | exonic | Y753N  | 2325    | 49      | 2%     |      | deleterious | probably_damaging |        |       |
| 105    | DIS3    | missense | C/T   | exonic | E126K  | 850     | 491     | 58%    |      | deleterious | probably_damaging |        |       |
| 105    | KRAS    | missense | A/G   | exonic | Q61H   | 5265    | 1633    | 32%    |      | deleterious | benign            | 1      | 1     |
| 153    | B2M     | UTR 5'   | C/A   | UTR 5' | -      | 640     | 134     | 21%    |      | -           | -                 |        |       |
| 153    | CSNK2A1 | splice   | T/C   | splice | -      | 595     | 284     | 48%    |      | -           | -                 |        |       |
| 157    | IGF1R   | missense | A/G   | exonic | N427S  | 691     | 21      | 3%     |      | tolerated   | benign            |        |       |
| 157    | BIRC3   | missense | G/C   | exonic | G127R  | 1006    | 125     | 12%    |      | tolerated   | benign            |        |       |
| 159    | IGF1R   | missense | G/A   | exonic | M1082I | 1472    | 108     | 7%     |      | deleterious | probably_damaging |        |       |
| 159    | DIS3    | missense | C/T   | exonic | R689Q  | 408     | 346     | 85%    |      | deleterious | probably_damaging | 1      |       |
| 168    | BRAF    | missense | A/T   | exonic | T546S  | 969     | 29      | 3%     | yes  | c.1636A>T   |                   |        |       |

| SAMPLE | GENE    | FUNC     | Gtype | LOC    | PTEIN  | POS_COV | VAR_COV | VRF(%) | GERM | SIFT        | POLYPHEN          | COSMIC | dbSNP |
|--------|---------|----------|-------|--------|--------|---------|---------|--------|------|-------------|-------------------|--------|-------|
| 168    | KRAS    | missense | C/T   | exonic | G13D   | 1174    | 106     | 9%     | yes  | deleterious | probably_damaging | 1      | 1     |
| 168    | KRAS    | missense | A/G   | exonic | Q61H   | 3019    | 393     | 13%    | yes  | deleterious | benign            | 1      | 1     |
| 169    | ATM     | missense | T/C   | exonic | I144T  | 974     | 30      | 3%     |      | deleterious | probably_damaging |        |       |
| 169    | XBP1    | missense | C/G   | exonic | G315A  | 2625    | 63      | 3%     |      | tolerated   | probably_damaging |        |       |
| 169    | TRAF2   | missense | G/C   | exonic | R393P  | 1137    | 66      | 6%     |      | deleterious | probably_damaging |        |       |
| 169    | MAF     | missense | T/C   | exonic | N275D  | 1039    | 78      | 8%     |      | deleterious | probably_damaging |        |       |
| 169    | IRF4    | missense | G/C   | exonic | D106H  | 3006    | 81      | 3%     |      | deleterious | probably_damaging |        |       |
| 169    | DIS3    | missense | C/T   | exonic | V198I  | 1419    | 614     | 43%    |      | tolerated   | benign            |        |       |
| 172    | RB1     | nonsense | A/T   | exonic | K722*  | 344     | 172     | 50%    |      | -           | -                 |        |       |
| 172    | KRAS    | missense | C/A   | exonic | G12V   | 737     | 293     | 40%    |      | deleterious | probably_damaging | 1      | 1     |
| 172    | CDKN2A  | missense | C/T   | exonic | A148T  | 2259    | 1107    | 49%    |      | deleterious | probably_damaging |        |       |
| 177    | NRAS    | missense | G/T   | exonic | Q61K   | 883     | 43      | 5%     |      | deleterious | benign            | 1      | 1     |
| 177    | NRAS    | missense | C/G   | exonic | G12A   | 1552    | 179     | 12%    |      | deleterious | benign            | 1      | 1     |
| 177    | PRDM1   | missense | T/C   | exonic | L784P  | 1127    | 559     | 49%    |      | deleterious | probably_damaging |        |       |
| 185    | NRAS    | missense | C/G   | exonic | G13R   | 803     | 20      | 2%     |      | deleterious | probably_damaging | 1      | 1     |
| 185    | CARD11  | missense | C/T   | exonic | V903I  | 2666    | 1148    | 44%    |      | deleterious | benign            |        | 1     |
| 189    | KRAS    | missense | C/G   | exonic | G12R   | 1553    | 193     | 12%    |      | deleterious | benign            | 1      | 1     |
| 189    | STAT3   | missense | G/A   | exonic | L207F  | 3618    | 577     | 18%    |      | tolerated   | probably_damaging |        |       |
| 190    | MAX     | missense | C/T   | exonic | R36K   | 609     | 59      | 10%    |      | deleterious | probably_damaging | 1      |       |
| 190    | MAX     | missense | C/A   | exonic | R35L   | 600     | 127     | 21%    |      | deleterious | probably_damaging | 1      |       |
| 190    | MAX     | missense | T/A   | exonic | E32V   | 565     | 146     | 26%    |      | deleterious | probably_damaging |        |       |
| 190    | PSMB9   | missense | G/A   | exonic | E112K  | 2885    | 1399    | 48%    |      | deleterious | probably_damaging | 1      |       |
| 227    | FAM46C  | missense |       | exonic | A297T  | 413     | 314     | 76%    |      | tolerated   | benign            | 1      |       |
| 230    | TGFBR2  | UTR 5'   | G/A   | UTR 5' | -      | 174     | 66      | 38%    |      | -           | -                 |        |       |
| 230    | IRF4    | missense | G/C   | exonic | K59N   | 3032    | 113     | 4%     |      | deleterious | probably_damaging |        |       |
| 236    | DIS3    | missense | C/G   | exonic | D479H  | 1335    | 55      | 4%     |      | deleterious | probably_damaging |        |       |
| 236    | DIS3    | missense | C/G   | exonic | D487H  | 1367    | 55      | 4%     |      | deleterious | probably_damaging |        |       |
| 236    | MAP3K14 | missense | C/T   | exonic | R404H  | 1424    | 146     | 10%    |      | tolerated   | benign            |        | 1     |
| 236    | DIS3    | missense | G/T   | exonic | D479E  | 1495    | 308     | 21%    |      | deleterious | probably_damaging |        |       |
| 239    | FAM46C  | missense | G/A   | exonic | R151H  | 1147    | 255     | 22%    |      | deleterious | probably_damaging |        |       |
| 240    | NRAS    | missense | C/T   | exonic | G12D   | 3166    | 418     | 13%    | yes  | deleterious | benign            | 1      | 1     |
| 252    | ATM     | missense | A/T   | exonic | T2947S | 783     | 38      | 5%     | yes  | deleterious | probably_damaging | 1      |       |
| 252    | TP53    | missense | T/C   | exonic | Y236C  | 5327    | 257     | 5%     | yes  | deleterious | probably_damaging | 1      |       |
| 257    | NRAS    | missense | G/C   | exonic | Q61E   | 285     | 21      | 7%     | yes  | deleterious | benign            | 1      | 1     |
| 257    | NRAS    | missense | C/G   | exonic | G12A   | 1228    | 68      | 6%     | yes  | deleterious | benign            | 1      | 1     |
| 257    | IFNGR2  | missense | C/T   | exonic | R39C   | 10347   | 3757    | 37%    | yes  | deleterious | probably_damaging |        |       |

| SAMPLE | GENE      | FUNC     | Gtype | LOC    | PTEIN  | POS_COV | VAR_COV | VRF(%) | GERM | SIFT        | POLYPHEN          | COSMIC | dbSNP |
|--------|-----------|----------|-------|--------|--------|---------|---------|--------|------|-------------|-------------------|--------|-------|
| 268    | IL6       | missense | A/C   | exonic |        | 333     | 176     | 35%    |      | ?           | ?                 |        | 1     |
| 268    | FGFR3     | missense | G/A   | exonic | V790M  | 675     | 326     | 48%    |      | deleterious | probably_damaging |        | 1     |
| 268    | IGF1R     | missense | T/C   | exonic | Y203H  | 1572    | 758     | 48%    |      | tolerated   | benign            |        |       |
| 268    | NRAS      | missense | C/G   | exonic | G13R   | 1865    | 928     | 50%    |      | deleterious | probably_damaging | 1      | 1     |
| 268    | IFNGR2    | missense | G/C   | exonic |        | 3911    | 1889    | 48%    |      | deleterious | probably_damaging | 1      | 1     |
| 269    | KRAS      | missense | A/C   | exonic | Y71D   | 979     | 25      | 3%     |      | deleterious | probably_damaging |        |       |
| 269    | KRAS      | UTR 3'   | C/G   | UTR 3' | _      | 5276    | 774     | 15%    |      | _           | _                 |        |       |
| 269    | KRAS      | missense | G/C   | exonic | Q61E   | 11405   | 4133    | 37%    |      | deleterious | benign            | 1      | 1     |
| 271    | KRAS      | missense | C/T   | exonic | G13D   | 1447    | 609     | 42%    |      | deleterious | possibly_damaging | 1      | 1     |
| 271    | FGFR3     | missense | A/G   | exonic | Y305C  | 1921    | 822     | 43%    |      | deleterious | probably_damaging |        |       |
| 275    | KRAS      | missense | C/A   | exonic | G12C   | 2179    | 479     | 22%    |      | deleterious | probably_damaging | 1      | 1     |
| 282    | KRAS      | missense | T/A   | exonic | Q61H   | 6074    | 637     | 10%    |      | deleterious | benign            | 1      | 1     |
| 282    | PSMB9     | missense | G/A   | exonic | V32I   | 1796    | 828     | 46%    |      | tolerated   | probably_damaging |        |       |
| 283    | TRAF3     | missense | C/T   | exonic | H136Y  | 677     | 76      | 11%    |      | deleterious | probably_damaging |        |       |
| 283    | BRAF      | missense | A/T   | exonic | V600E  | 947     | 345     | 36%    |      | deleterious | probably_damaging | 1      | 1     |
| 294    | NRAS      | missense | T/C   | exonic | Q61R   | 85      | 35      | 41%    |      | deleterious | benign            | 1      | 1     |
| 294    | TNFRSF13B | missense | G/A   | exonic | P205S  | 3759    | 1871    | 50%    |      | tolerated   | benign            |        |       |
| 298    | KRAS      | missense | T/A   | exonic | Q61H   | 3704    | 347     | 9%     |      | deleterious | benign            | 1      | 1     |
| 303    | KRAS      | missense | G/T   | exonic | Q22K   | 776     | 92      | 12%    |      | deleterious | probably_damaging | 1      | 1     |
| 303    | TP53      | missense | T/G   | exonic | I251L  | 982     | 144     | 15%    |      | deleterious | probably_damaging | 1      | 1     |
| 303    | PSMB8     | missense | C/T   | exonic | R11Q   | 1666    | 207     | 12%    |      | tolerated   | benign            | 1      |       |
| 303    | IFNGR2    | missense | T/C   | exonic | I223T  | 1038    | 290     | 28%    |      | tolerated   | benign            |        |       |
| 303    | CARD11    | missense | C/T   | exonic | R331H  | 1225    | 441     | 36%    |      | tolerated   | probably_damaging |        |       |
| 307    | BRAF      | missense | T/G   | exonic | K601T  | 578     | 20      | 3%     |      | deleterious | benign            |        |       |
| 307    | PRDM1     | missense | T/G   | exonic | L676R  | 1616    | 259     | 16%    |      | deleterious | probably_damaging |        |       |
| 307    | DIS3      | missense | A/T   | exonic | Y782N  | 3619    | 2427    | 68%    |      | deleterious | probably_damaging |        |       |
| 309    | BRAF      | missense | C/T   | exonic | D594N  | 566     | 70      | 12%    |      | deleterious | probably_damaging | 1      |       |
| 309    | DIS3      | missense | C/G   | exonic | D487H  | 1478    | 289     | 20%    |      | deleterious | probably_damaging |        |       |
| 312    | TNFRSF21  | missense | T/C   | exonic | N527S  | 574     | 180     | 31%    |      | tolerated   | benign            |        | 1     |
| 316    | WHSC1     | missense | G/C   | exonic | K1351N | 1084    | 532     | 49%    |      | deleterious | unknown           |        |       |

Figure S1: Location of detected mutations in the most recurrently mutated genes.

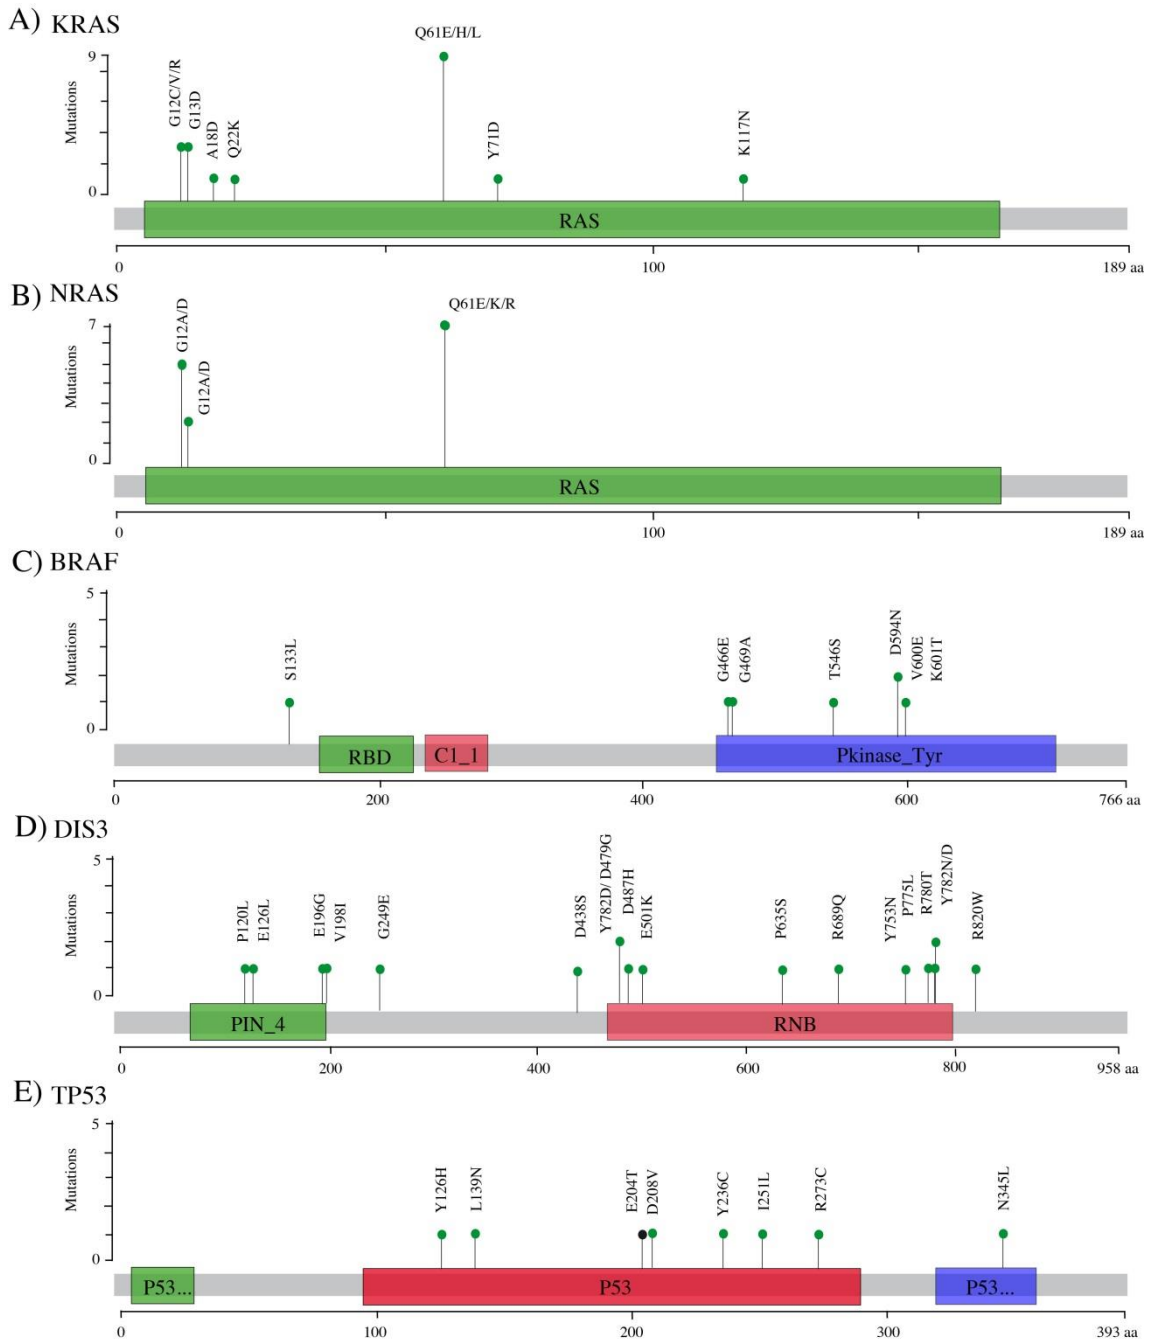

Supplement: 2018.188839.RUIZ-HEREDIA_SUPPL.pdf [file 2018.188839.RUIZ-HEREDIA_SUPPL.pdf]
