# Supplementary material
Source: PubMed Central journal article supplement (PMC6278988)
Supplement: 2018_188839-Disclosures_and_Contributions.pdf [file 2018_188839-Disclosures_and_Contributions.pdf]

Haematologica  
HAEMATOL/2018/188839  
Version 4

Mutational screening of newly diagnosed multiple myeloma patients by  
deep targeted sequencing

Yanira Ruiz-Heredia, Beatriz Sánchez-Vega, Esther Onecha, Santiago Barrio, Rafael Alonso, Jose Carlos Martínez-Ávila, Isabel Cuenca, Xabier Agirre, Esteban Braggio, Miguel-T Hernández, Rafael Martínez, Laura Rosiñol, Norma Gutierrez, Marisa Martin-Ramos, Enrique M. Ocio, María Asunción Echeveste, Jaime Pérez de Oteyza, Albert Oriol, Joan Bargay, Mercedes Gironella, Rosa Ayala, Joan Bladé, María-Victoria Mateos, Klaus M. Kortum, Keith Stewart, Ramón García-Sanz, Jesús San Miguel, Juan José Lahuerta, and Joaquín Martínez-Lopez

Disclosures: The authors declare no conflict of interest This work has been partially supported by CRIS foundation grant, Red Tematica de Investigacion Cooperativa en Cancer (RTICC) (RD12/0036/0061) and Fondo de Investigacion Sanitaria PI15/01484 all awarded to Joaquin Martinez Lopez, Contratos Predoctorales de Formacion en Investigacion en Salud i-PFIS (IFI 14/00008) awarded to Yanira Ruiz-Heredia.

Contributions: YR Performed the full research, data analysis and article writing. BS, EO, SB, IC performed experimental steps. performed clinical data collection. JCM performed statistical analysis. XA, RG, performed the result interpretation. EB, KMK and KS performed parts of the experimental design. RA, MTH, RM, LR, NG, MM, EMO, MAE, JM, AO, JB, MG, RA, JB, MVM, JS and JJJ performed samples and clinical data collection. JM performed the experimental design, clinical data collection, data interpretation and article writing.
